# Supplementary material for: COVID-19 Vaccination Uptake and Hesitancy Among Current Tobacco Users
Source: PubMed Central journal article supplement — Tob Use Insights. 2021 Dec 20;14:1179173X211068027. doi: 10.1177/1179173X211068027 (PMC8721404; doi:10.1177/1179173x211068027), 2021-12-20
Supplement: sj-pdf-1-tui-10.1177_1179173X211068027.pdf [file sj-pdf-1-tui-10.1177_1179173X211068027.pdf]

Supplementary Table 1: Beliefs and attitudes, by theme and sub-theme, regarding COVID-19 vaccination among those unsure or unlikely to get vaccinated

| Sex                                                   | Race  | Age | Cigarette Smoker | E-cigarette User | Likelihood of Vaccination | Comment                                                                                                                                                                                                                                                                                                                                                                                                                                                                                   |
|-------------------------------------------------------|-------|-----|------------------|------------------|---------------------------|-------------------------------------------------------------------------------------------------------------------------------------------------------------------------------------------------------------------------------------------------------------------------------------------------------------------------------------------------------------------------------------------------------------------------------------------------------------------------------------------|
| <b>1. Vaccine was not researched or tested enough</b> |       |     |                  |                  |                           |                                                                                                                                                                                                                                                                                                                                                                                                                                                                                           |
| Female                                                | White | 52  | Yes              | Yes              | Very Unlikely             | I do not plan on getting the vaccine [without] knowing the side effects.                                                                                                                                                                                                                                                                                                                                                                                                                  |
| Female                                                | White | 40  | Yes              | No               | Somewhat Unlikely         | I'm not comfortable yet as the long term study of side effects has not been conducted.                                                                                                                                                                                                                                                                                                                                                                                                    |
| Female                                                | White | 47  | No               | Yes              | Very Unlikely             | Side effects are unknown.                                                                                                                                                                                                                                                                                                                                                                                                                                                                 |
| Male                                                  | White | 66  | Yes              | No               | Very Unlikely             | All the vaccines granted "Emergency Use Authorization" are still in their infancy, with no one knowing the longer term effects they could have on those who have rolled up their sleeves. I can wait until studies are done on the after-effects of the vaccines.                                                                                                                                                                                                                         |
| Male                                                  | White | 42  | Yes              | No               | Very Unlikely             | Vaccine was too rushed. Long term problems will not show up and the focus groups were too small.                                                                                                                                                                                                                                                                                                                                                                                          |
| Female                                                | White | 36  | No               | Yes              | Very Unlikely             | It is too new we do not know the side effects.                                                                                                                                                                                                                                                                                                                                                                                                                                            |
| Female                                                | White | 26  | Yes              | No               | Very Unlikely             | It's too soon. Side effects unknown.                                                                                                                                                                                                                                                                                                                                                                                                                                                      |
| Female                                                | White | 42  | Yes              | No               | Somewhat Unlikely         | I might consider getting vaccinated in the fall. I am not inclined to do it now while it is still so new.                                                                                                                                                                                                                                                                                                                                                                                 |
| Female                                                | White | 36  | Yes              | No               | Very Unlikely             | I don't trust the vaccine- it's too new and not enough us known about possible long term effects. It also doesn't mean I won't get COVID or can't pass it on to others. I also don't get a flu shot for the same reason!                                                                                                                                                                                                                                                                  |
| Male                                                  | Black | 30  | Yes              | No               | Very Unlikely             | I understand that I am at a higher risk of COVID19 related complications because I am a tobacco user, however I am also young and healthy. The numbers are, relatively, in my favor. We do not have tons of data on the virus and I think we have less on the vaccinations and the affects it will have long term. I am not completely opposed to the vaccination, but there is not enough data available with proof that it does what it says without doing anything it says it doesn't. |
| Female                                                | White | 42  | Yes              | No               | Very Unlikely             | Vaccine was developed to quick. I don't trust it. No cure for cancer, common cold etc. A vaccine for COVID 19 developed in less than a year. No thanks.                                                                                                                                                                                                                                                                                                                                   |
| Female                                                | Black | 58  | Yes              | No               | Very Unlikely             | Not enough information, too risky.                                                                                                                                                                                                                                                                                                                                                                                                                                                        |
| Female                                                | White | 39  | Yes              | Yes              | Very Unlikely             | I have no intention of getting the vaccine. I would prefer to take                                                                                                                                                                                                                                                                                                                                                                                                                        |

|        |       |    |     |     |                   |                                                                                                                                                                                                                                                                                                                                                                                         |
|--------|-------|----|-----|-----|-------------------|-----------------------------------------------------------------------------------------------------------------------------------------------------------------------------------------------------------------------------------------------------------------------------------------------------------------------------------------------------------------------------------------|
|        |       |    |     |     |                   | my chances with COVID than risk suffering permanent side effects from the vaccine, specially knowing that the pharmaceutical companies cannot be held responsible for any lasting side effects plus the fact that it seemed to have been pushed through to get it out to the public quickly.                                                                                            |
| Female | White | 37 | Yes | No  | Very Unlikely     | Needs further testing.                                                                                                                                                                                                                                                                                                                                                                  |
| Female | White | 64 | Yes | No  | Very Unlikely     | I feel the vaccine is being forced on people, no one forces the flu vaccine, and not enough research on it, the vaccine came about too quickly.                                                                                                                                                                                                                                         |
| Female | White | 43 | Yes | No  | Very Unlikely     | Scientists came up too quickly with a vaccine.                                                                                                                                                                                                                                                                                                                                          |
| Female | White | 45 | Yes | No  | Unsure            | I just don't have enough information to decide at this time.                                                                                                                                                                                                                                                                                                                            |
| Female | White | 39 | Yes | No  | Very Unlikely     | I am not getting the vaccine because it doesn't matter, you are still supposed to wear a mask and avoid [people] so what would change. Plus no one knows what the long term affects will be. Pharmaceutical companies cause illness and death all the time, just as much or if not as much as COVID.                                                                                    |
| Male   | Black | 44 | Yes | No  | Very Unlikely     | I don't trust it due to the fact it was not tested long enough. It takes years to come up with a vaccine if that wasn't the case no one would get the flu shot however it took years to make sure folks could get the vaccine without getting sick and with this vaccine it was released to fast and people had [passed] away and it gotten extremely sick from it so I'm not doing it. |
| Female | Other | 39 | Yes | No  | Very Unlikely     | There are many who need it. I would let them have it. Also want to see the long term effects neurologically.                                                                                                                                                                                                                                                                            |
| Female | White | 57 | Yes | No  | Very Unlikely     | Not enough research on long term effects.                                                                                                                                                                                                                                                                                                                                               |
| Male   | White | 55 | Yes | No  | Somewhat Unlikely | Not enough testing done prior to distribution. Know of people that received complete vaccination and caught COVID-19 within a week. Already had it and told if I were to get again my symptoms would be less than first time.                                                                                                                                                           |
| Female | White | 33 | No  | Yes | Very Unlikely     | I don't believe there is enough research on the vaccine to ensure my quality of life in a few years....                                                                                                                                                                                                                                                                                 |
| Female | White | 43 | Yes | No  | Somewhat Unlikely | I worry about the safety of it. I feel like there aren't enough tests on the safety or possible side effects.                                                                                                                                                                                                                                                                           |
| Female | White | 49 | Yes | No  | Somewhat Unlikely | It is still in trial stages. In my opinion the risks outweigh the benefit. Not effective long term.                                                                                                                                                                                                                                                                                     |
| Female | White | 45 | Yes | No  | Somewhat Unlikely | I'm afraid of long term effects 10-20 years from now.                                                                                                                                                                                                                                                                                                                                   |

|                                                                                  |        |       |    |     |     |               |                                                                                                                                                                                                                                                                                                                                                                                         |
|----------------------------------------------------------------------------------|--------|-------|----|-----|-----|---------------|-----------------------------------------------------------------------------------------------------------------------------------------------------------------------------------------------------------------------------------------------------------------------------------------------------------------------------------------------------------------------------------------|
|                                                                                  | Female | White | 44 | Yes | No  | Very Unlikely | I feel like there is not enough research to support getting this vaccine.                                                                                                                                                                                                                                                                                                               |
| <b>1a. Vaccine was not researched or tested enough → Vaccine is experimental</b> |        |       |    |     |     |               |                                                                                                                                                                                                                                                                                                                                                                                         |
|                                                                                  | Female | White | 41 | Yes | Yes | Very Unlikely | I will not get an experimental vaccination.                                                                                                                                                                                                                                                                                                                                             |
|                                                                                  | Female | White | 41 | Yes | No  | Very Unlikely | I will not be getting the experimental vaccine.                                                                                                                                                                                                                                                                                                                                         |
|                                                                                  | Female | White | 55 | Yes | No  | Very Unlikely | I am not a lab rat.                                                                                                                                                                                                                                                                                                                                                                     |
|                                                                                  | Female | White | 38 | Yes | No  | Very Unlikely | I will not get the vaccine. I am not an experiment.                                                                                                                                                                                                                                                                                                                                     |
|                                                                                  | Female | Other | 57 | Yes | No  | Unsure        | I'm not sure it's safe or been tested long enough, I kind of think we are the test subjects for this vaccine.                                                                                                                                                                                                                                                                           |
| <b>2. Does not trust the vaccine</b>                                             |        |       |    |     |     |               |                                                                                                                                                                                                                                                                                                                                                                                         |
|                                                                                  | Female | White | 42 | Yes | No  | Very Unlikely | Vaccine was developed to quick. I don't trust it. No cure for cancer, common cold etc. A vaccine for COVID 19 developed in less than a year. No thanks.                                                                                                                                                                                                                                 |
|                                                                                  | Male   | White | 54 | Yes | No  | Very Unlikely | Honestly I do not trust the vaccine! I will wait and see all the actual data.                                                                                                                                                                                                                                                                                                           |
|                                                                                  | Female | White | 39 | Yes | No  | Very Unlikely | Don't trust it, don't want it.                                                                                                                                                                                                                                                                                                                                                          |
|                                                                                  | Male   | Black | 44 | Yes | No  | Very Unlikely | I don't trust it due to the fact it was not tested long enough. It takes years to come up with a vaccine if that wasn't the case no one would get the flu shot however it took years to make sure folks could get the vaccine without getting sick and with this vaccine it was released to fast and people had [passed] away and it gotten extremely sick from it so I'm not doing it. |
|                                                                                  | Female | White | 42 | Yes | No  | Very Unlikely | I don't trust any of the vaccines for it. I've done lots of research and not comfortable with it at all.                                                                                                                                                                                                                                                                                |
| <b>2a. Does not trust the vaccine → Do not trust pharmaceutical companies</b>    |        |       |    |     |     |               |                                                                                                                                                                                                                                                                                                                                                                                         |
|                                                                                  | Female | White | 39 | Yes | Yes | Very Unlikely | I have no intention of getting the vaccine. I would prefer to take my chances with COVID than risk suffering permanent side effects from the vaccine, specially knowing that the pharmaceutical companies cannot be held responsible for any lasting side effects plus the fact that it seemed to have been pushed through to get it out to the public quickly.                         |
|                                                                                  | Male   | White | 39 | Yes | No  | Very Unlikely | I do not believe in vaccinations and I do not trust these big Pharma companies to have our best interest in mind.                                                                                                                                                                                                                                                                       |
|                                                                                  | Female | White | 39 | Yes | No  | Very Unlikely | I am not getting the vaccine because it doesn't matter, you are still supposed to wear a mask and avoid [people] so what would change. Plus no one knows what the long term affects will be. Pharmaceutical companies cause illness and death all the time,                                                                                                                             |

|                                                                                             |       |    |     |    |                   |                                                                                                                                                                                                                                                                                                                                                       |                                          |
|---------------------------------------------------------------------------------------------|-------|----|-----|----|-------------------|-------------------------------------------------------------------------------------------------------------------------------------------------------------------------------------------------------------------------------------------------------------------------------------------------------------------------------------------------------|------------------------------------------|
|                                                                                             |       |    |     |    |                   |                                                                                                                                                                                                                                                                                                                                                       | just as much or if not as much as COVID. |
| <b>3. Concerned about experiencing side effects</b>                                         |       |    |     |    |                   |                                                                                                                                                                                                                                                                                                                                                       |                                          |
| Female                                                                                      | White | 56 | Yes | No | Unsure            | Afraid of reactions.                                                                                                                                                                                                                                                                                                                                  |                                          |
| Male                                                                                        | Black | 33 | Yes | No | Very Unlikely     | I just hear the side effects of the vaccine and that doesn't make me feel comfortable.                                                                                                                                                                                                                                                                |                                          |
| Female                                                                                      | White | 45 | Yes | No | Somewhat Unlikely | I'm afraid of long term effects 10-20 years from now.                                                                                                                                                                                                                                                                                                 |                                          |
| <b>3a. Concerned about experiencing side effects → Related to past personal experiences</b> |       |    |     |    |                   |                                                                                                                                                                                                                                                                                                                                                       |                                          |
| Male                                                                                        | White | 57 | Yes | No | Very Unlikely     | I'm one of those people who tend to have negative vaccine reactions.                                                                                                                                                                                                                                                                                  |                                          |
| Female                                                                                      | White | 49 | Yes | No | Very Unlikely     | Most serious reactions to the vaccine have been in patients with allergies to meds. I am allergic to 3 meds (two developed within the last 5 yrs.) and had a documented reaction to a dose of the anthrax vaccine. I am not an anti-vaxer or a conspiracy theorist. But I am concerned about how my body may react given my individual circumstances. |                                          |
| Female                                                                                      | White | 44 | Yes | No | Very Unlikely     | I have delayed T-cell reactions, scared of having injection and any side effects including death.                                                                                                                                                                                                                                                     |                                          |
| Female                                                                                      | White | 53 | Yes | No | Very Unlikely     | My boyfriend got the shot on Saturday, spent the night with me, by 1 am on Sunday I was full blown sick... went to doctors...had taken COVID test...then the doc yelled at me for being near him...because of my immune system...told me NOT to get it or he will see me in the hospital. Just like I was when my boyfriend started his chemo.        |                                          |
| <b>4. Vaccine is not safe</b>                                                               |       |    |     |    |                   |                                                                                                                                                                                                                                                                                                                                                       |                                          |
| Female                                                                                      | White | 33 | Yes | No | Very Unlikely     | Not safe.                                                                                                                                                                                                                                                                                                                                             |                                          |
| Female                                                                                      | White | 72 | Yes | No | Very Unlikely     | Sorry it is not FDA approved.....do you eat meat that is FDA approved or meat that is FDA authorization.....<br><a href="https://www.theverge.com/22189236/fda-approval-authorization-difference-clearance-vaccines">https://www.theverge.com/22189236/fda-approval-authorization-difference-clearance-vaccines</a> ....                              |                                          |
| Female                                                                                      | Other | 57 | Yes | No | Unsure            | I'm not sure it's safe or been tested long enough, i kind of think we are the test subjects for this vaccine.                                                                                                                                                                                                                                         |                                          |
| Female                                                                                      | White | 43 | Yes | No | Somewhat Unlikely | I worry about the safety of it. I feel like there aren't enough tests on the safety or possible side effects.                                                                                                                                                                                                                                         |                                          |
| <b>5. Scared to get the vaccine</b>                                                         |       |    |     |    |                   |                                                                                                                                                                                                                                                                                                                                                       |                                          |
| Female                                                                                      | White | 52 | Yes | No | Somewhat Unlikely | Scared                                                                                                                                                                                                                                                                                                                                                |                                          |

|                                                                                             |        |       |    |     |     |                   |                                                                                                                                                                                                                                                                                                    |
|---------------------------------------------------------------------------------------------|--------|-------|----|-----|-----|-------------------|----------------------------------------------------------------------------------------------------------------------------------------------------------------------------------------------------------------------------------------------------------------------------------------------------|
|                                                                                             | Female | White | 60 | Yes | Yes | Unsure            | Scared not to and scare to get the vaccination.                                                                                                                                                                                                                                                    |
| <b>6. Does not find the vaccine to be beneficial</b>                                        |        |       |    |     |     |                   |                                                                                                                                                                                                                                                                                                    |
|                                                                                             | Female | White | 42 | Yes | No  | Very Unlikely     | Do not feel as I need it. There are more people who could benefit from it and I would not feel comfortable taking a vaccine from more at risk people.                                                                                                                                              |
|                                                                                             | Female | Other | 39 | Yes | No  | Very Unlikely     | There are many who need it. I would let them have it. Also want to see the long term effects neurologically.                                                                                                                                                                                       |
|                                                                                             | Female | White | 27 | Yes | No  | Very Unlikely     | I do not believe in the vaccination I don't believe it helps anything.                                                                                                                                                                                                                             |
|                                                                                             | Female | White | 49 | Yes | No  | Somewhat Unlikely | It is still in trial stages. In my opinion the risks outweigh the benefit. Not effective long term.                                                                                                                                                                                                |
| <b>6a. Does not find the vaccine to be beneficial → Already had COVID-19</b>                |        |       |    |     |     |                   |                                                                                                                                                                                                                                                                                                    |
|                                                                                             | Male   | White | 28 | Yes | No  | Very Unlikely     | I have strong antibodies due to recently having COVID.                                                                                                                                                                                                                                             |
| <b>6b. Does not find the vaccine to be beneficial → Does not change PPE requirements</b>    |        |       |    |     |     |                   |                                                                                                                                                                                                                                                                                                    |
|                                                                                             | Female | White | 39 | Yes | No  | Very Unlikely     | I am not getting the vaccine because it doesn't matter, you are still supposed to wear a mask and avoid people so what would change. Plus no one knows what the long term affects will be. Pharmaceutical companies cause illness and death all the time, just as much or if not as much as COVID. |
| <b>6c. Does not find the vaccine to be beneficial → Does not protect from getting virus</b> |        |       |    |     |     |                   |                                                                                                                                                                                                                                                                                                    |
|                                                                                             | Male   | White | 51 | Yes | No  | Very Unlikely     | The vaccine does not keep one from getting COVID 19.                                                                                                                                                                                                                                               |
|                                                                                             | Female | White | 36 | Yes | No  | Very Unlikely     | I don't trust the vaccine- it's too new and not enough us known about possible long term effects. It also doesn't mean I won't get COVID or can't pass it on to others. I also don't get a flu shot for the same reason!                                                                           |
| <b>6d. Does not find the vaccine to be beneficial → Virus is curable</b>                    |        |       |    |     |     |                   |                                                                                                                                                                                                                                                                                                    |
|                                                                                             | Female | White | 58 | Yes | No  | Very Unlikely     | I'm not getting a vaccine for something that's 99% curable. I don't get the flu vaccine either                                                                                                                                                                                                     |
| <b>6de. Does not find the vaccine to be beneficial → Immune system is good</b>              |        |       |    |     |     |                   |                                                                                                                                                                                                                                                                                                    |
|                                                                                             | Female | White | 48 | Yes | No  | Very Unlikely     | I do not see the necessity in it. Generally when I get sick it does not last long. My immune system is good.                                                                                                                                                                                       |
| <b>7. Does not receive any vaccinations</b>                                                 |        |       |    |     |     |                   |                                                                                                                                                                                                                                                                                                    |
|                                                                                             | Female | White | 36 | Yes | No  | Very Unlikely     | I don't trust the vaccine- it's too new and not enough us known about possible long term effects. It also doesn't mean I won't get COVID or can't pass it on to others. I also don't get a flu shot for the same reason!                                                                           |
|                                                                                             | Female | White | 35 | Yes | No  | Very Unlikely     | I don't vaccinate.                                                                                                                                                                                                                                                                                 |

|                                                                            |        |       |    |     |     |                   |                                                                                                                                                        |
|----------------------------------------------------------------------------|--------|-------|----|-----|-----|-------------------|--------------------------------------------------------------------------------------------------------------------------------------------------------|
|                                                                            | Female | White | 58 | Yes | No  | Very Unlikely     | I'm not getting a vaccine for something that's 99% curable. I don't get the flu vaccine either.                                                        |
|                                                                            | Male   | White | 39 | Yes | No  | Very Unlikely     | I do not believe in vaccinations and I do not trust these big Pharma companies to have our best interest in mind.                                      |
|                                                                            | Male   | White | 54 | Yes | No  | Very Unlikely     | I dont believe in it.                                                                                                                                  |
| <b>7a. Does not receive any vaccinations → Does not like getting shots</b> |        |       |    |     |     |                   |                                                                                                                                                        |
|                                                                            | Female | White | 29 | Yes | No  | Very Unlikely     | I don't like getting shots.                                                                                                                            |
| <b>8. Logistical Issues</b>                                                |        |       |    |     |     |                   |                                                                                                                                                        |
|                                                                            | Male   | White | 45 | Yes | No  | Very Unlikely     | I have no car or money to get places.                                                                                                                  |
|                                                                            | Female | White | 54 | Yes | No  | Unsure            | I will be traveling overseas very soon so not sure if I have enough time to get both doses, and can't find location to get J&J.                        |
| <b>9. Refuses to get vaccine (reason unclear)</b>                          |        |       |    |     |     |                   |                                                                                                                                                        |
|                                                                            | Female | White | 43 | No  | No  | Somewhat Unlikely | Just not sure that I want to get it.                                                                                                                   |
|                                                                            | Female | White | 36 | Yes | No  | Very Unlikely     | I REFUSE to EVER get the vaccine.                                                                                                                      |
|                                                                            | Male   | White | 41 | Yes | No  | Very Unlikely     | I will not be getting vaccinated at all.                                                                                                               |
|                                                                            | Male   | -     | 33 | Yes | No  | Very Unlikely     | I am not going to get it.                                                                                                                              |
|                                                                            | Female | White | 48 | Yes | No  | Very Unlikely     | I do not want it.                                                                                                                                      |
| <b>10. Other</b>                                                           |        |       |    |     |     |                   |                                                                                                                                                        |
|                                                                            | Female | White | 36 | Yes | No  | Very Unlikely     | Dr s have told us for years there is nothing that can be done for a virus. It would be impossible to assume they found something within the last year. |
|                                                                            | Male   | Other | 34 | No  | Yes | Very Unlikely     | I still don't have a choice as to which experimental vaccine I get injected with. I at least want the illusion of self-agency with this.               |
|                                                                            | Female | White | 37 | Yes | No  | Unsure            | If my children cannot get vaccinated then why should I they can get COVID as well and I have one that is high risk.                                    |
